# Supplementary material
Source: publisher figshare collection journal article supplement (https://sage.figshare.com/ndownloader/files/36578580)
Supplement: Supplementary file 1 [file 36578580]

**HSP90AB1 promotes the proliferation, migration, and glycolysis of head and neck squamous cell carcinoma**

Table S1. Sequence of primers used in qRT-PCR

| Gene | Sequence (5’-3’) | |
| --- | --- | --- |
| HSP90AB1 | Forward | TTGACATCATCCCCAACCCTC |
|  | Reverse | ACCAAACTGCCCAATCATGGA |
| HSP90AA1 | Forward | TATAAGGCAGGCGCGGGGGT |
|  | Reserve | TGCACCAGCCTGCAAAGCTTCC |
| GRP94 | Forward | GCTTCGGTCAGGGTATCTTT |
|  | Reserve | AGGCTCTTCTTCCACCTTTG |
| TRAP1 | Forward | AGCGCACTCATCAGGAAACT |
|  | Reserve | GCATGAACAGGCCGTAATCT |
| β-actin | Forward | CTCCATCCTGGCCTCGCTGT |
|  | Reverse | GCTGTCACCTTCACCGTTCC |
| HK2 | Forward | GCCATCCTGCAACACTTAGGGCTTGAG |
|  | Reverse | GTGAGGATGTAGCTTGTAGAGGGTCCC |
| PFKL | Forward | GGAGAAGCTGCGCGGAGGTTTAC |
|  | Reverse | ATTGTGCCAGCATCTTCAGCATGAG |
| ALDOA | Forward | AGGCCATGCTTGCACTCAGAAGT |
|  | Reverse | AGGGCCCAGGGCTTCAGCAGG |
| PGK1 | Forward | ATGTCGCTTTCTAACAAGCTGA |
|  | Reverse | GCGGAGGTTCTCCAGCA |
| ENO1 | Forward | GACTTGGCTGGCAACTCTG |
|  | Reverse | GGTCATCGGGAGACTTGAA |
| ENO2 | Forward | TCATGGTGAGTCATCGCTCAGGAG |
|  | Reverse | ATGTCCGGCAAAGCGAGCTTCATC |
| PKM2 | Forward | GCCCGTGAGGCAGAGGCTGC |
|  | Reverse | TGGTGAGGACGATTATGGCCC |
| LDHA | Forward | ATGGCAACTCTAAAGGATCA |
|  | Reverse | GCAACTTGCAGTTCGGGC |
